# Supplementary figures and images for: Integration of Light and Temperature in the Regulation of Circadian Gene Expression in Drosophila
Source: PLOS journal article supplement (doi:10.1371/journal.pgen.0030054), 2007-04-04

Supplemental Figure S1

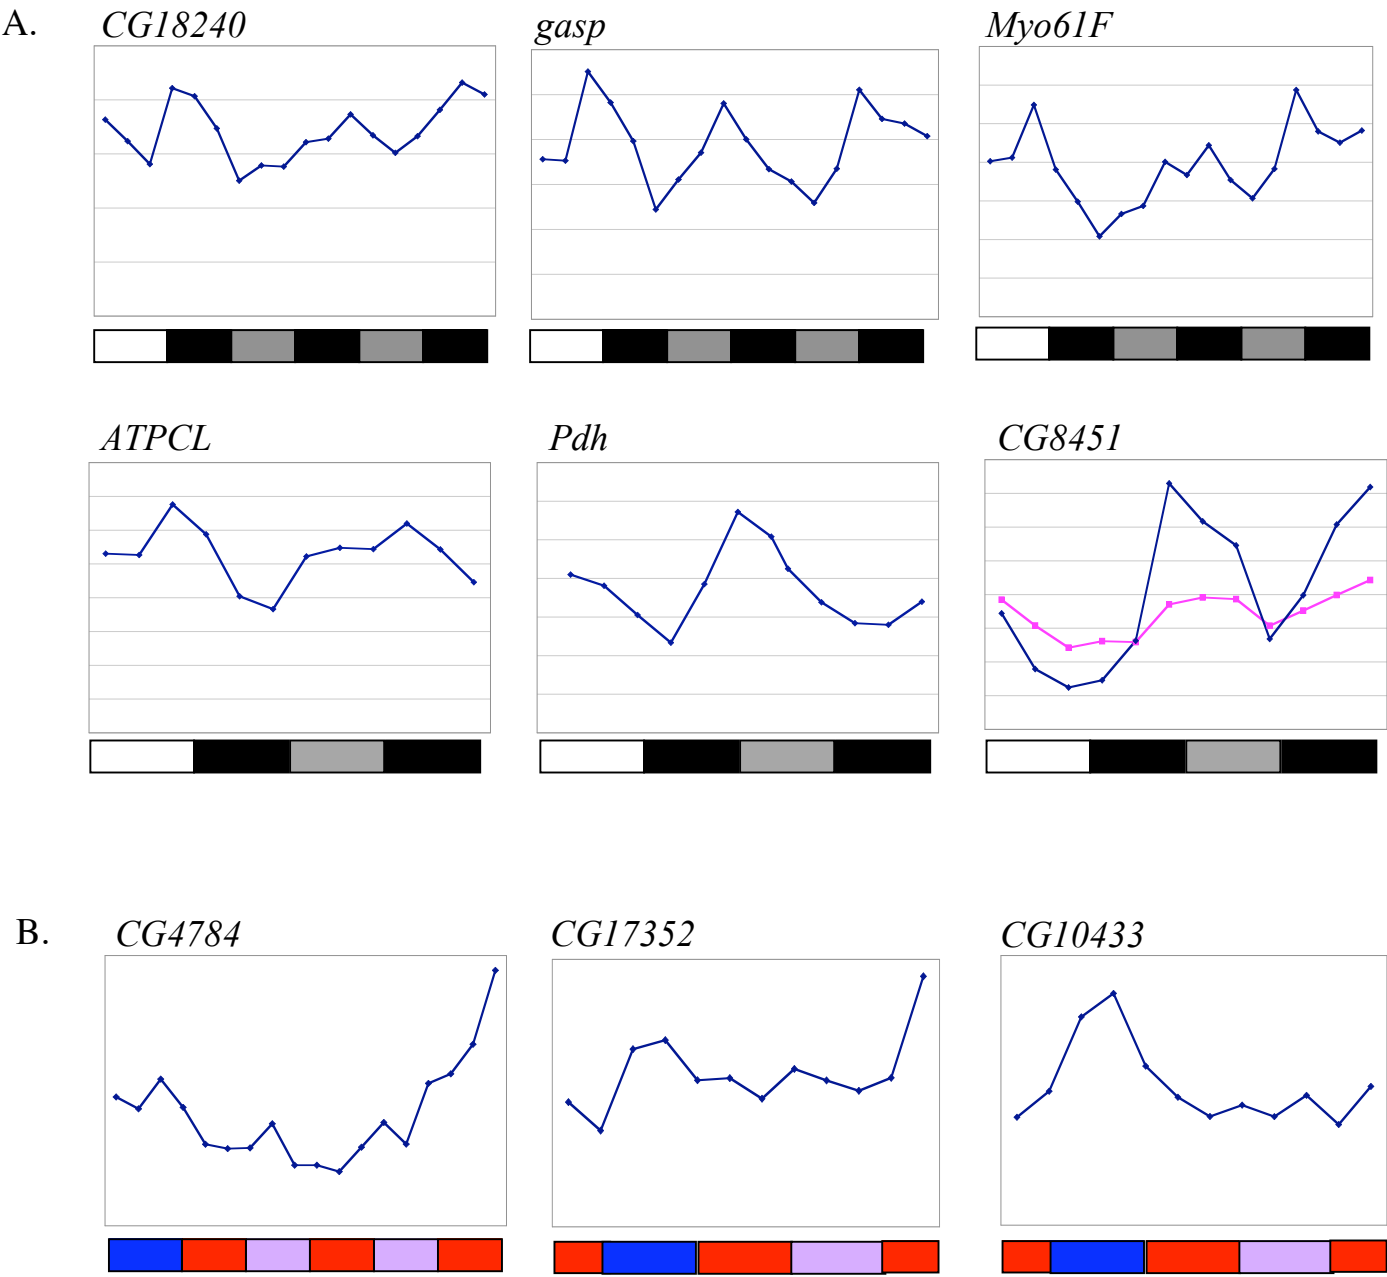

Supplement: S1 (10.1371/journal.pgen.0030054.s001) [file journal.pgen.0030054.s001]

# Supplemental Figure S3

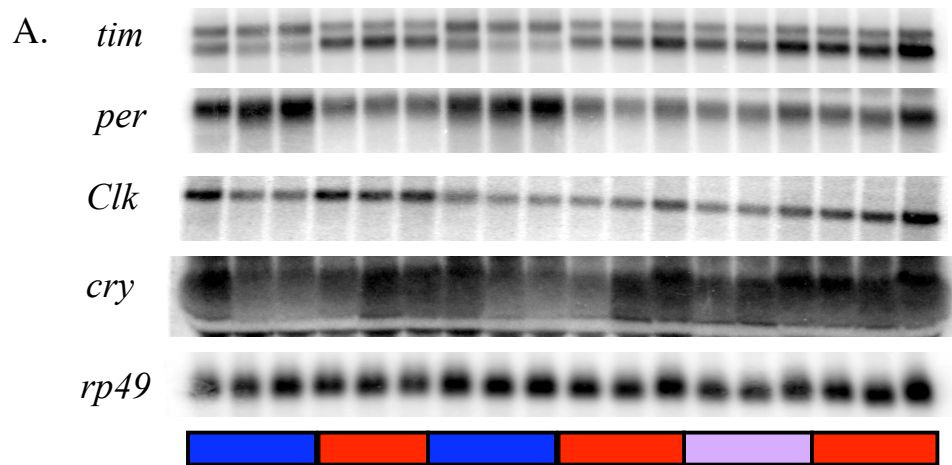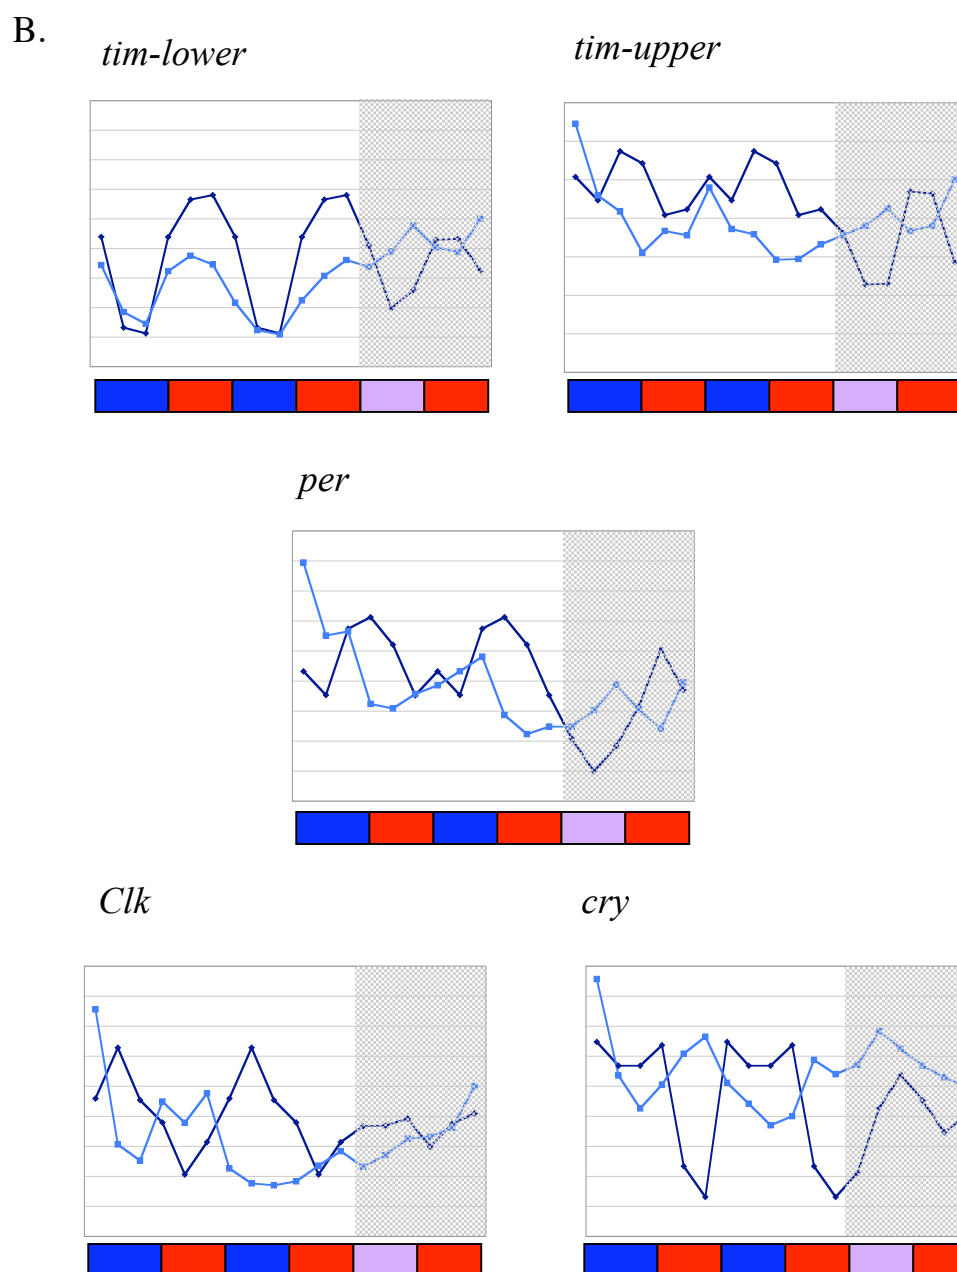

Supplement: S3 (10.1371/journal.pgen.0030054.s003) [file journal.pgen.0030054.s003]
